# Supplementary material
Source: publisher figshare collection journal article supplement (https://sage.figshare.com/ndownloader/files/14579408)
Supplement: Supplementary file 1 [file 14579408]

Replication materials for this paper can be found at

<https://dataverse.harvard.edu/dataset.xhtml?persistentId=doi:10.7910/DVN/S9CFRZ>
